# Supplementary material for: Inhibition of Cell-Free Translation and Replication of Tobacco Mosaic Virus RNA by Exogenously Added 5′-Proximal Fragments of the Genomic RNA
Source: MDPI journal article supplement (doi:10.3390/v14091962), 2022-09-04

Figure S1

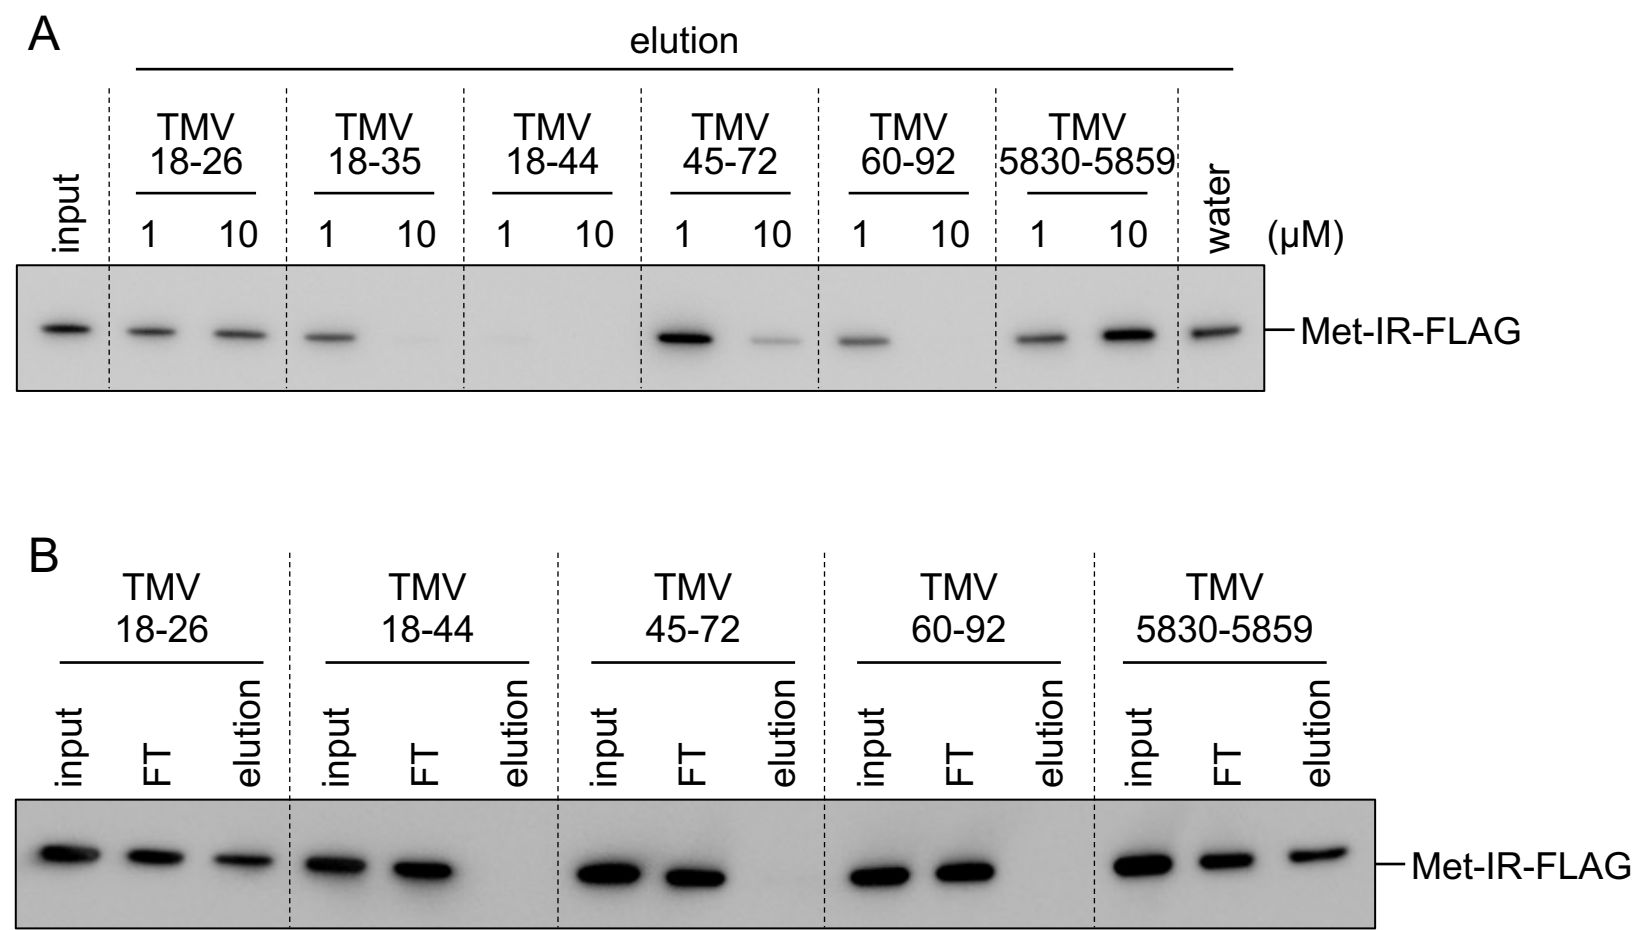

**Figure S1.** Inhibition of the binding of TMV Met-IR to TMV1-110-st by small RNA fragments (related to Figure 2). The results of independent experiments from Figure 2 using 1 or 10 μM (A) and 9.48 μM (B) of small RNA fragments are shown. The samples before affinity purification (input), from flow-through fractions after affinity purification (FT), and from the eluates from the beads with streptomycin (elution) were analyzed.

Figure S2

A

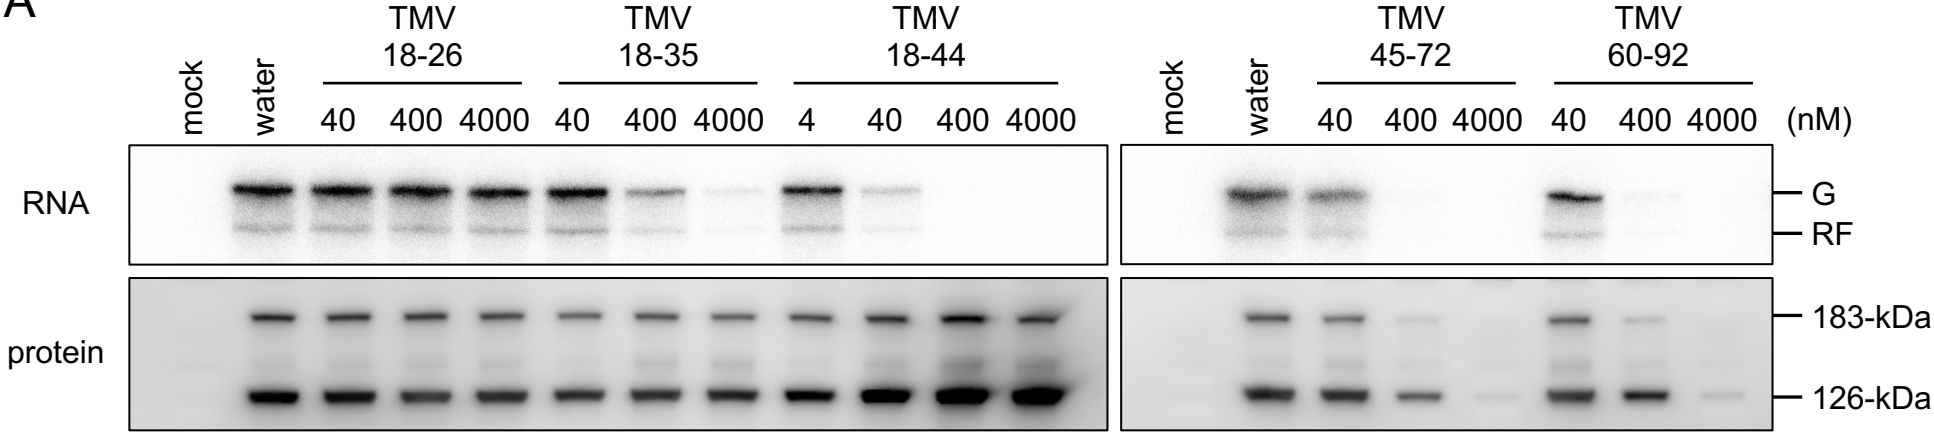

B

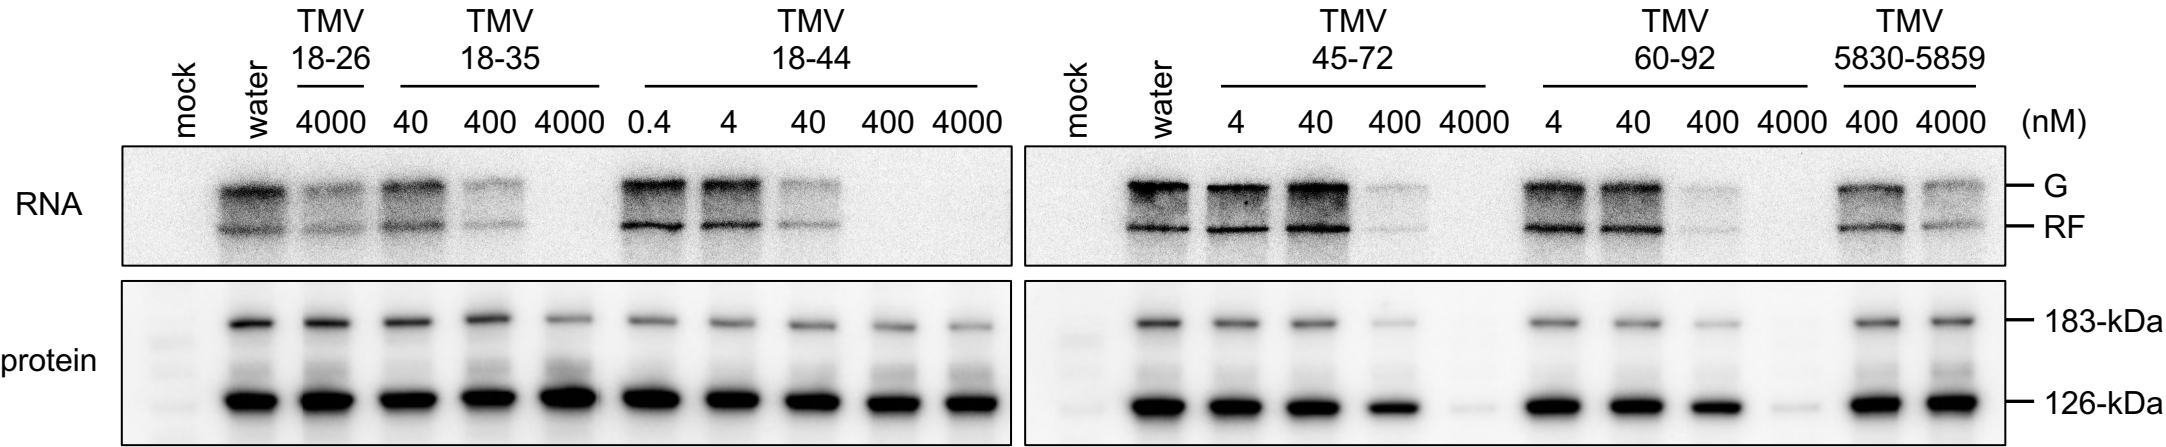

Figure S2

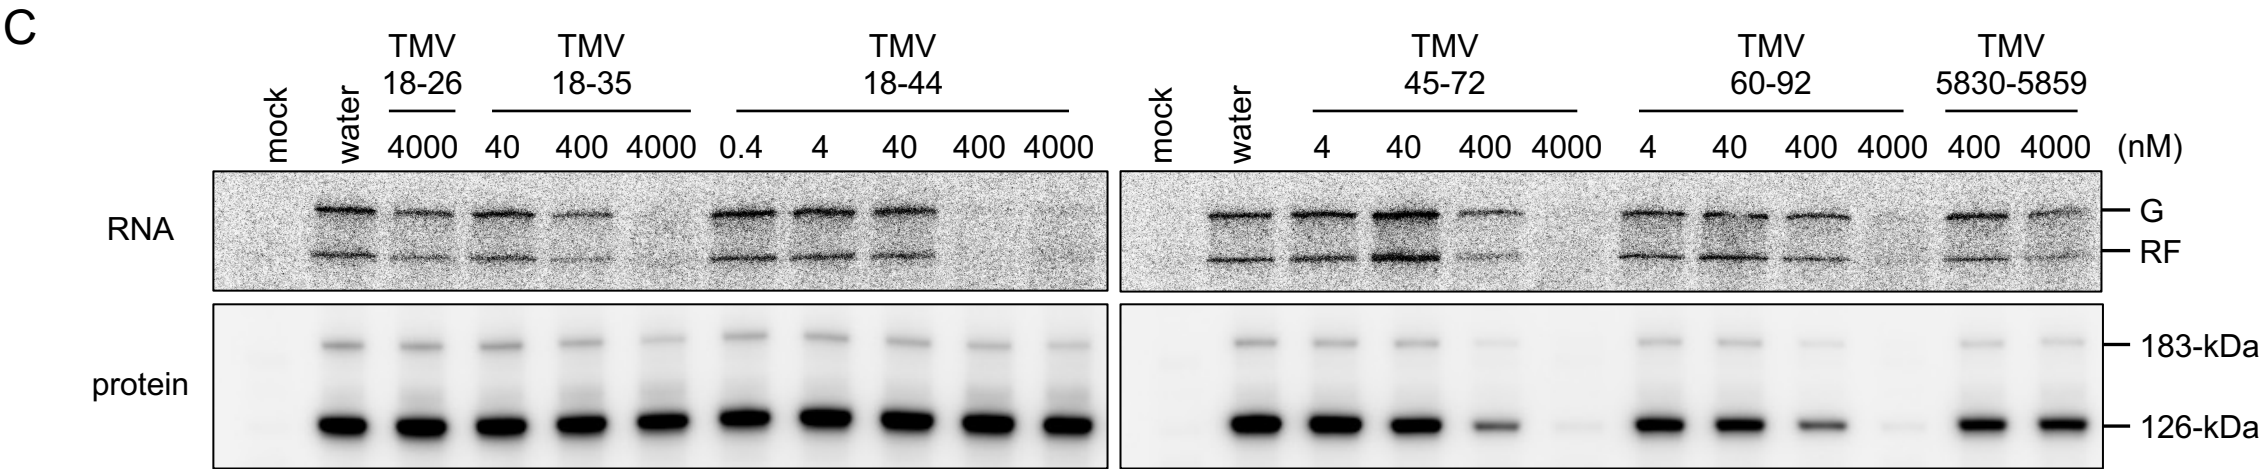

**Figure S2.** Effects of the addition of small RNA fragments on *in vitro* translation and replication of TMV RNA (related to Figure 3). The results of three additional independent experiments are shown in (A)–(C).

Figure S3

**Figure S3.** Relative band intensity of viral replication product (related to Figures 3 and S2). Band intensity of *de novo*-synthesized TMV genomic RNA in Figures 3 and S2A–C are shown (A and B–D, respectively). Values were normalized to the water control.

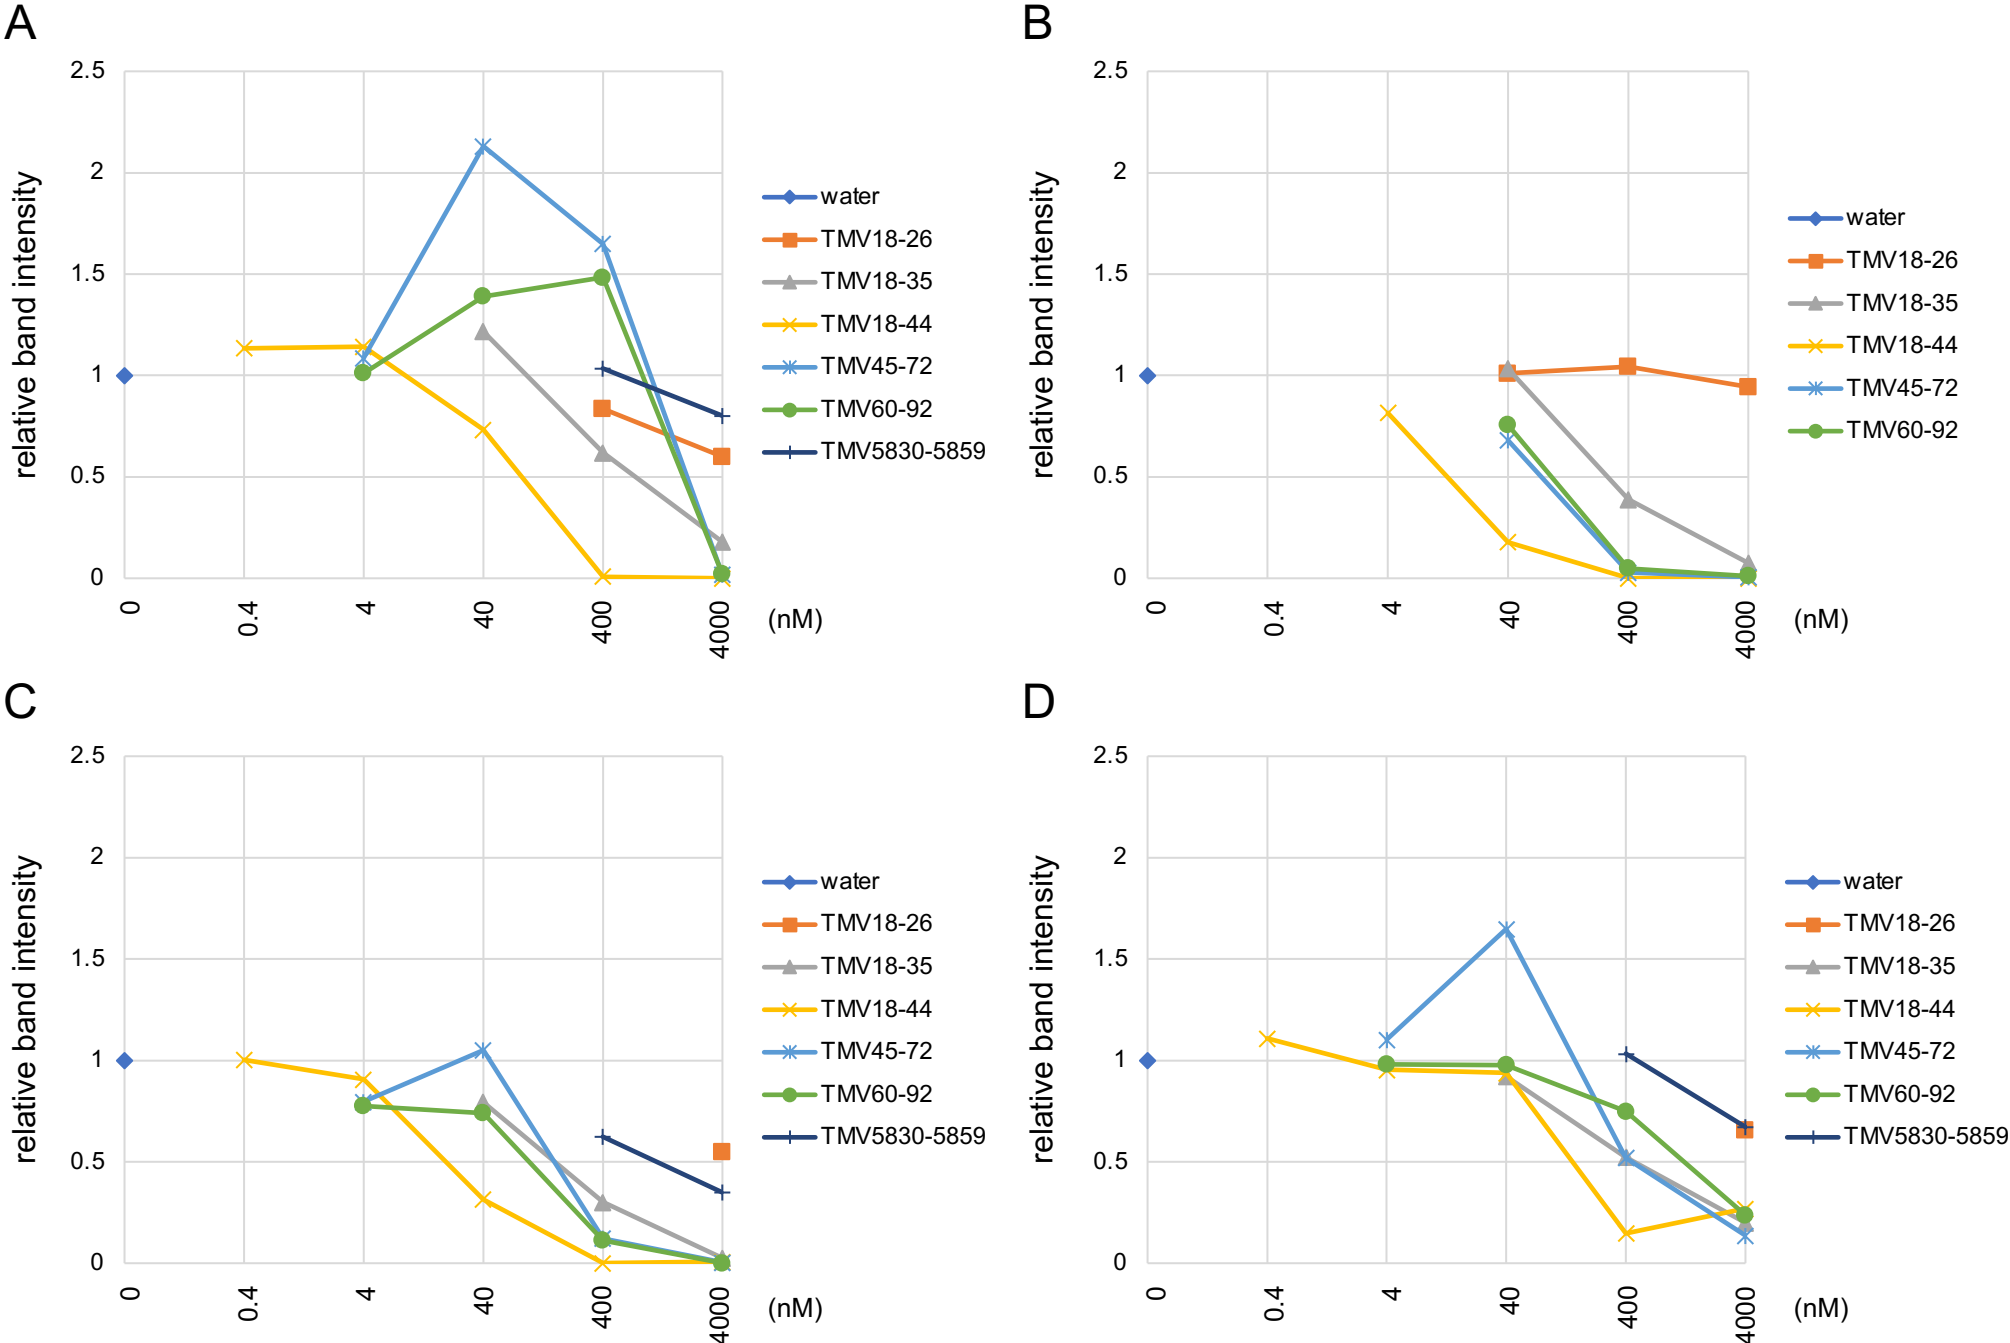

Supplement: s1 [file s1]
